# Supplementary material for: Genetic Control over mtDNA and Its Relationship to Major Depressive Disorder
Source: PubMed Central journal article supplement (PMC4691240; doi:10.1016/j.cub.2015.10.065), 2015-12-21
Supplement: mmc1.pdf [file mmc1.pdf]

**Current Biology**

**Supplemental Information**

## **Genetic Control over mtDNA and Its Relationship to Major Depressive Disorder**

**Na Cai, Yihan Li, Simon Chang, Jieqin Liang, Chongyun Lin, Xiufei Zhang, Lu Liang, Jingchu Hu, Wharton Chan, Kenneth S Kendler, Tomas Malinauskas, Guo-Jen Huang, Qibin Li, Richard Mott, and Jonathan Flint**

**Figure S1, Related to Figure 1: GWAS on mtDNA with MDD as covariate**

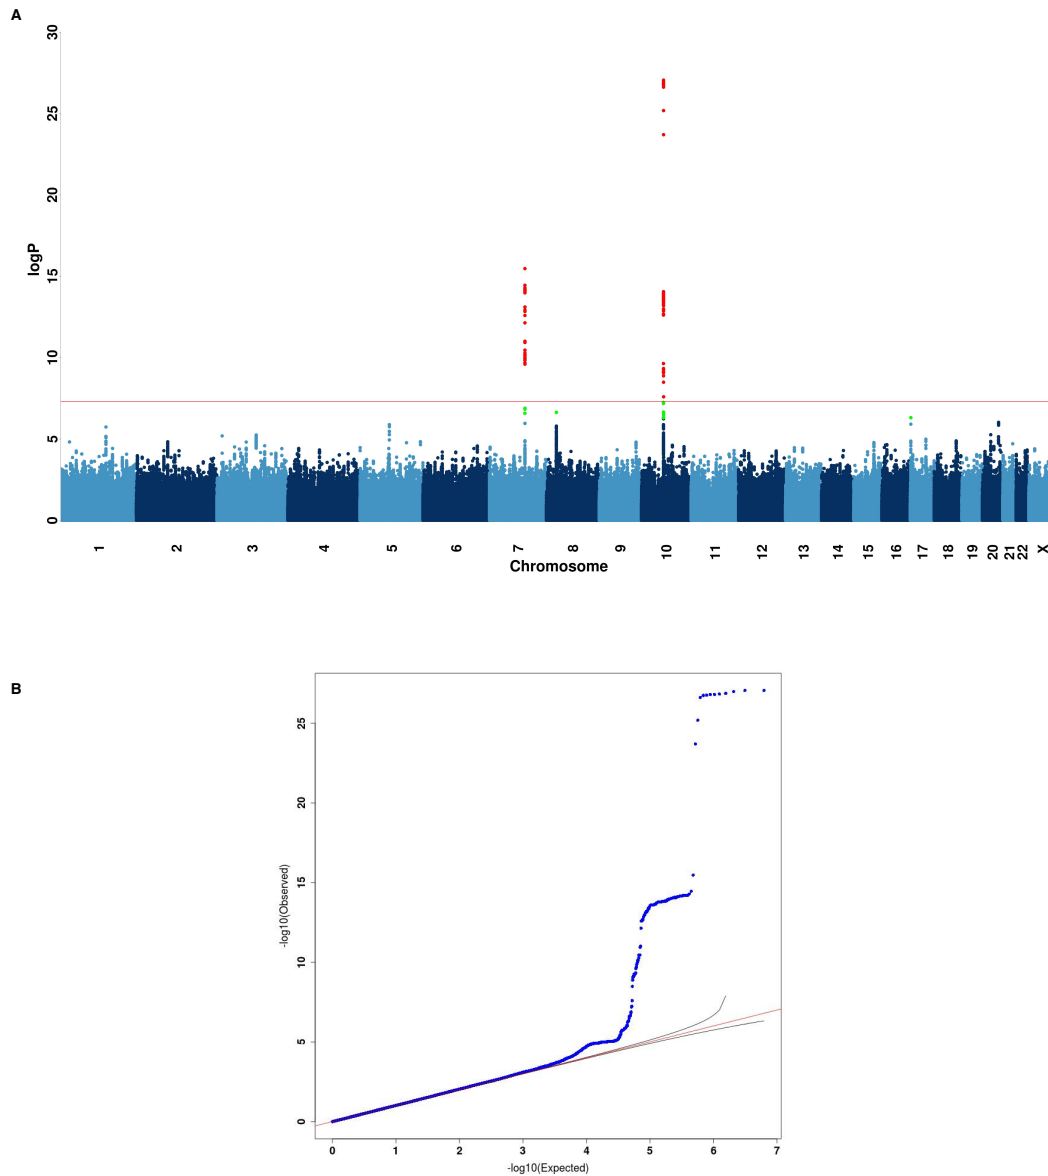

(A) Manhattan plot of genome wide association for amount of mtDNA with MDD as covariate. (B) Quantile-quantile plot of GWAS for amount of mtDNA with MDD as covariate, using leave-one-chromosome-out (LOCO) linear mixed model implemented in FastLMM on 10,442 samples (5,224 cases of MDD, 5,218 controls), genomic control lambda ( $\lambda$ ) = 1.017.

**Table S1, Related to Table 1: List of SNPs associated with amount of mtDNA with P values < 10<sup>-6</sup>**

| CHR | POS      | RSID        | REF | ALT | FREQ  | INFO  | HWE_P    | P        | LOGP   |
|-----|----------|-------------|-----|-----|-------|-------|----------|----------|--------|
| 7   | 92058506 | rs10267476  | C   | T   | 0.319 | 0.911 | 1.20E-06 | 6.90E-07 | 6.161  |
| 7   | 92266198 | rs147826719 | C   | T   | 0.321 | 0.963 | 1.20E-01 | 1.45E-12 | 11.840 |
| 7   | 92290278 | rs41459146  | T   | C   | 0.327 | 0.986 | 2.40E-01 | 5.97E-13 | 12.224 |
| 7   | 92295417 | rs2282985   | C   | G   | 0.502 | 0.992 | 4.90E-01 | 2.06E-09 | 8.686  |
| 7   | 92296668 | rs56353205  | T   | C   | 0.326 | 0.988 | 2.30E-01 | 3.24E-13 | 12.489 |
| 7   | 92296829 | rs4727280   | C   | T   | 0.480 | 0.978 | 6.60E-01 | 1.24E-09 | 8.907  |
| 7   | 92299545 | rs2282986   | T   | C   | 0.327 | 0.993 | 2.80E-01 | 2.28E-13 | 12.643 |
| 7   | 92299964 | rs2106135   | C   | T   | 0.327 | 0.993 | 2.80E-01 | 2.22E-13 | 12.653 |
| 7   | 92300863 | rs2301557   | C   | T   | 0.326 | 0.988 | 2.50E-01 | 2.79E-13 | 12.555 |
| 7   | 92301040 | rs9640606   | C   | T   | 0.495 | 0.993 | 7.10E-01 | 8.64E-10 | 9.063  |
| 7   | 92303196 | rs10254702  | A   | G   | 0.502 | 0.993 | 6.70E-01 | 1.17E-09 | 8.934  |
| 7   | 92303554 | rs3757823   | A   | G   | 0.502 | 0.992 | 6.80E-01 | 9.35E-10 | 9.029  |
| 7   | 92305445 | rs75882441  | T   | A   | 0.328 | 0.992 | 4.20E-01 | 1.88E-13 | 12.725 |
| 7   | 92305515 | rs6977712   | A   | T   | 0.483 | 0.991 | 7.10E-01 | 5.49E-10 | 9.261  |
| 7   | 92305899 | rs6973871   | T   | C   | 0.483 | 0.991 | 7.40E-01 | 5.49E-10 | 9.260  |
| 7   | 92308798 | rs12670783  | A   | G   | 0.502 | 0.991 | 6.70E-01 | 7.55E-10 | 9.122  |
| 7   | 92312803 | rs2282987   | G   | C   | 0.329 | 0.989 | 5.80E-01 | 1.46E-14 | 13.837 |
| 7   | 92313733 | rs2237573   | A   | G   | 0.500 | 0.994 | 7.10E-01 | 2.92E-10 | 9.535  |
| 7   | 92315330 | rs6964803   | C   | T   | 0.328 | 0.996 | 4.20E-01 | 1.35E-14 | 13.868 |
| 7   | 92315660 | rs11981340  | T   | C   | 0.329 | 0.997 | 4.90E-01 | 1.61E-14 | 13.792 |
| 7   | 92315774 | rs11981374  | T   | C   | 0.327 | 0.992 | 4.60E-01 | 6.73E-15 | 14.172 |
| 7   | 92316244 | rs13437843  | C   | T   | 0.329 | 0.998 | 5.00E-01 | 1.65E-14 | 13.782 |
| 7   | 92316282 | rs60726864  | T   | A   | 0.329 | 0.998 | 5.00E-01 | 1.65E-14 | 13.782 |
| 7   | 92317374 | rs2282988   | T   | C   | 0.329 | 0.998 | 4.90E-01 | 1.97E-14 | 13.706 |
| 7   | 92317887 | rs10243384  | C   | T   | 0.477 | 0.997 | 7.70E-01 | 5.94E-11 | 10.226 |
| 7   | 92319472 | rs11533993  | T   | C   | 0.329 | 0.998 | 4.90E-01 | 1.74E-14 | 13.760 |
| 7   | 92319488 | rs11533994  | A   | C   | 0.501 | 0.994 | 6.30E-01 | 1.85E-10 | 9.733  |
| 7   | 92320169 | rs10267477  | T   | C   | 0.501 | 0.996 | 6.00E-01 | 1.82E-10 | 9.739  |
| 7   | 92321584 | rs1972508   | G   | A   | 0.588 | 0.939 | 1.90E-02 | 1.02E-10 | 9.993  |
| 7   | 92324050 | rs11981129  | C   | T   | 0.483 | 0.997 | 6.00E-01 | 5.10E-11 | 10.293 |
| 7   | 92324355 | rs10225660  | T   | C   | 0.328 | 0.996 | 5.10E-01 | 1.34E-14 | 13.873 |
| 7   | 92324419 | rs17164721  | G   | T   | 0.328 | 0.996 | 5.40E-01 | 1.41E-14 | 13.850 |
| 7   | 92326346 | rs2282989   | C   | T   | 0.327 | 0.997 | 5.30E-01 | 9.87E-15 | 14.005 |
| 7   | 92328956 | rs1004051   | C   | A   | 0.327 | 0.997 | 4.70E-01 | 1.17E-14 | 13.932 |
| 7   | 92329126 | rs3731318   | C   | T   | 0.327 | 0.997 | 4.70E-01 | 1.17E-14 | 13.931 |
| 7   | 92329957 | rs1004052   | C   | G   | 0.327 | 0.997 | 4.90E-01 | 1.29E-14 | 13.888 |
| 7   | 92330480 | rs3802079   | C   | T   | 0.327 | 0.997 | 4.70E-01 | 1.17E-14 | 13.931 |
| 7   | 92331695 | rs2079146   | T   | C   | 0.480 | 0.995 | 6.70E-01 | 4.40E-11 | 10.357 |
| 7   | 92333408 | rs10254840  | A   | G   | 0.477 | 0.981 | 8.80E-01 | 1.38E-10 | 9.859  |
| 7   | 92408370 | rs445       | C   | T   | 0.342 | 0.906 | 1.70E-03 | 6.03E-16 | 15.219 |
| 7   | 92428239 | rs2299242   | C   | G   | 0.408 | 0.923 | 3.90E-03 | 5.53E-07 | 6.257  |
| 7   | 92464778 | rs78065312  | C   | G   | 0.228 | 0.903 | 4.20E-06 | 3.16E-10 | 9.500  |

|    |          |             |   |   |       |       |          |          |        |
|----|----------|-------------|---|---|-------|-------|----------|----------|--------|
| 7  | 92484093 | rs10953073  | A | G | 0.336 | 0.910 | 4.70E-06 | 3.18E-07 | 6.497  |
| 7  | 92489813 | rs2023699   | A | G | 0.336 | 0.910 | 5.30E-06 | 3.19E-07 | 6.496  |
| 8  | 15607313 | rs2543154   | G | A | 0.511 | 0.984 | 6.80E-01 | 2.52E-07 | 6.598  |
| 10 | 59827743 | rs61851889  | G | A | 0.145 | 0.997 | 6.80E-01 | 9.21E-07 | 6.036  |
| 10 | 59829407 | rs2221296   | C | T | 0.145 | 0.998 | 7.60E-01 | 8.78E-07 | 6.057  |
| 10 | 59830413 | rs61851890  | C | G | 0.145 | 0.998 | 7.90E-01 | 9.22E-07 | 6.035  |
| 10 | 59837321 | rs61851911  | G | A | 0.145 | 0.999 | 7.90E-01 | 9.42E-07 | 6.026  |
| 10 | 59839893 | rs61851913  | G | C | 0.145 | 0.998 | 7.90E-01 | 9.42E-07 | 6.026  |
| 10 | 59844227 | rs80306558  | G | T | 0.160 | 0.991 | 8.30E-01 | 3.84E-08 | 7.416  |
| 10 | 59849616 | rs16911771  | C | G | 0.160 | 0.988 | 7.50E-01 | 4.67E-08 | 7.331  |
| 10 | 59854651 | rs1698469   | A | C | 0.808 | 0.987 | 5.90E-02 | 7.60E-07 | 6.119  |
| 10 | 59855663 | rs61850576  | A | T | 0.162 | 0.987 | 8.10E-01 | 4.53E-08 | 7.344  |
| 10 | 59862105 | rs61850577  | G | T | 0.167 | 0.979 | 7.30E-01 | 2.01E-10 | 9.697  |
| 10 | 59870890 | rs61850578  | C | T | 0.145 | 0.992 | 8.50E-01 | 5.93E-10 | 9.227  |
| 10 | 59874268 | rs16911810  | T | A | 0.145 | 0.992 | 8.20E-01 | 5.93E-10 | 9.227  |
| 10 | 59876328 | rs77599563  | G | T | 0.145 | 0.992 | 7.90E-01 | 5.77E-10 | 9.239  |
| 10 | 59880706 | rs61850584  | G | T | 0.145 | 0.989 | 7.60E-01 | 4.80E-10 | 9.319  |
| 10 | 59889478 | rs138825781 | T | C | 0.145 | 0.992 | 7.60E-01 | 4.86E-10 | 9.313  |
| 10 | 59891501 | rs12569763  | C | A | 0.145 | 0.991 | 7.90E-01 | 4.86E-10 | 9.314  |
| 10 | 59904889 | rs73287122  | A | G | 0.149 | 0.994 | 9.10E-01 | 1.28E-13 | 12.893 |
| 10 | 59905514 | rs61850589  | G | T | 0.149 | 0.994 | 9.10E-01 | 1.28E-13 | 12.893 |
| 10 | 59905849 | rs10509086  | C | G | 0.150 | 0.995 | 9.70E-01 | 1.42E-13 | 12.846 |
| 10 | 59906486 | rs73287129  | G | A | 0.150 | 0.995 | 1.00E+00 | 1.42E-13 | 12.846 |
| 10 | 59908601 | rs61850590  | A | G | 0.150 | 0.993 | 1.00E+00 | 1.25E-13 | 12.904 |
| 10 | 59914787 | rs12571364  | G | A | 0.151 | 0.993 | 1.00E+00 | 3.14E-14 | 13.503 |
| 10 | 59925048 | rs7072206   | C | T | 0.151 | 0.992 | 4.90E-01 | 2.07E-14 | 13.683 |
| 10 | 59927787 | rs57851212  | A | T | 0.152 | 0.993 | 4.90E-01 | 1.71E-14 | 13.766 |
| 10 | 59929700 | rs77599079  | T | C | 0.152 | 0.992 | 5.90E-01 | 5.82E-15 | 14.235 |
| 10 | 59938336 | rs12570088  | A | G | 0.155 | 0.994 | 5.00E-01 | 6.15E-15 | 14.211 |
| 10 | 59941791 | rs10509088  | C | T | 0.156 | 0.999 | 9.40E-01 | 6.40E-15 | 14.194 |
| 10 | 59946672 | rs1199105   | T | C | 0.156 | 0.999 | 9.20E-01 | 1.25E-14 | 13.902 |
| 10 | 59947543 | rs12252749  | A | T | 0.156 | 0.999 | 9.40E-01 | 1.13E-14 | 13.948 |
| 10 | 59957000 | rs77350161  | G | A | 0.156 | 0.995 | 9.40E-01 | 1.09E-14 | 13.963 |
| 10 | 59957071 | rs12252003  | A | C | 0.149 | 0.938 | 2.10E-01 | 7.73E-15 | 14.112 |
| 10 | 59960083 | rs1625716   | T | G | 0.155 | 0.998 | 8.90E-01 | 1.11E-14 | 13.957 |
| 10 | 59966533 | rs58375950  | C | T | 0.155 | 0.998 | 8.30E-01 | 1.21E-14 | 13.918 |
| 10 | 59967203 | rs60679872  | C | T | 0.155 | 0.999 | 8.60E-01 | 1.21E-14 | 13.918 |
| 10 | 59969111 | rs12261547  | G | C | 0.155 | 0.999 | 8.30E-01 | 1.21E-14 | 13.918 |
| 10 | 59970430 | rs61875332  | G | T | 0.155 | 0.999 | 8.60E-01 | 1.21E-14 | 13.918 |
| 10 | 59971818 | rs12251970  | C | T | 0.155 | 0.998 | 8.60E-01 | 1.21E-14 | 13.917 |
| 10 | 59974730 | rs61875333  | G | C | 0.155 | 0.998 | 8.00E-01 | 1.21E-14 | 13.916 |
| 10 | 59987662 | rs12572236  | G | T | 0.155 | 0.998 | 8.60E-01 | 8.60E-15 | 14.065 |
| 10 | 59990325 | rs11006087  | C | T | 0.155 | 0.998 | 8.00E-01 | 8.60E-15 | 14.065 |
| 10 | 60001675 | rs7900114   | C | T | 0.155 | 0.998 | 8.00E-01 | 1.01E-14 | 13.994 |
| 10 | 60004329 | rs139600710 | G | C | 0.155 | 0.995 | 6.20E-01 | 8.62E-15 | 14.064 |
| 10 | 60023959 | rs61873887  | G | A | 0.155 | 0.998 | 8.60E-01 | 8.33E-15 | 14.079 |

|    |          |             |   |   |       |       |          |          |        |
|----|----------|-------------|---|---|-------|-------|----------|----------|--------|
| 10 | 60031460 | rs12572520  | T | G | 0.155 | 0.998 | 7.80E-01 | 8.22E-15 | 14.085 |
| 10 | 60032636 | rs2790176   | A | G | 0.155 | 0.998 | 7.80E-01 | 8.22E-15 | 14.085 |
| 10 | 60035152 | rs2275442   | C | T | 0.155 | 0.998 | 7.80E-01 | 8.22E-15 | 14.085 |
| 10 | 60047177 | rs3758567   | G | C | 0.155 | 0.999 | 8.00E-01 | 1.21E-14 | 13.917 |
| 10 | 60049790 | rs12241783  | G | T | 0.155 | 0.999 | 7.50E-01 | 1.01E-14 | 13.997 |
| 10 | 60052201 | rs11006105  | C | T | 0.155 | 0.999 | 7.50E-01 | 1.01E-14 | 13.997 |
| 10 | 60052999 | rs12264744  | C | T | 0.155 | 0.999 | 7.50E-01 | 1.01E-14 | 13.997 |
| 10 | 60065855 | rs59030640  | G | A | 0.154 | 0.990 | 8.60E-01 | 7.57E-15 | 14.121 |
| 10 | 60084394 | rs112187169 | C | A | 0.151 | 0.985 | 4.80E-01 | 9.81E-14 | 13.008 |
| 10 | 60092695 | rs61873953  | G | A | 0.156 | 0.994 | 2.40E-01 | 8.43E-15 | 14.074 |
| 10 | 60095105 | rs112660736 | G | T | 0.137 | 0.958 | 5.00E-01 | 9.84E-15 | 14.007 |
| 10 | 60095266 | rs16912153  | G | A | 0.137 | 0.958 | 5.00E-01 | 9.86E-15 | 14.006 |
| 10 | 60099333 | rs59474782  | G | A | 0.146 | 0.942 | 6.00E-03 | 9.23E-14 | 13.035 |
| 10 | 60100089 | rs4948291   | C | T | 0.158 | 0.994 | 4.80E-01 | 1.83E-14 | 13.738 |
| 10 | 60106835 | rs1963927   | G | T | 0.462 | 0.996 | 5.00E-01 | 1.27E-07 | 6.895  |
| 10 | 60116030 | rs12255735  | G | C | 0.156 | 0.993 | 2.30E-01 | 7.47E-15 | 14.127 |
| 10 | 60118681 | rs10826172  | T | C | 0.462 | 0.996 | 5.40E-01 | 1.13E-07 | 6.947  |
| 10 | 60121976 | rs11006120  | C | G | 0.158 | 0.993 | 4.60E-01 | 1.19E-14 | 13.926 |
| 10 | 60122066 | rs11006121  | C | T | 0.463 | 0.991 | 3.30E-01 | 1.14E-07 | 6.943  |
| 10 | 60122678 | rs4145785   | A | T | 0.462 | 0.996 | 5.00E-01 | 1.16E-07 | 6.937  |
| 10 | 60125877 | rs11006122  | C | T | 0.462 | 0.996 | 4.80E-01 | 1.14E-07 | 6.942  |
| 10 | 60127410 | rs10826174  | G | C | 0.464 | 0.989 | 4.40E-01 | 1.06E-07 | 6.974  |
| 10 | 60142116 | rs9971282   | C | T | 0.162 | 0.956 | 6.40E-02 | 2.39E-27 | 26.622 |
| 10 | 60142402 | rs11006125  | A | T | 0.168 | 0.982 | 8.30E-02 | 1.11E-27 | 26.957 |
| 10 | 60142800 | rs9971104   | G | T | 0.168 | 0.984 | 9.00E-02 | 9.16E-28 | 27.038 |
| 10 | 60142880 | rs11006126  | T | C | 0.169 | 0.978 | 9.00E-02 | 8.73E-28 | 27.059 |
| 10 | 60144207 | rs4390300   | G | A | 0.489 | 0.987 | 1.40E-03 | 7.22E-07 | 6.141  |
| 10 | 60144884 | rs2279340   | C | T | 0.171 | 0.990 | 3.50E-01 | 2.76E-27 | 26.558 |
| 10 | 60144998 | rs2279339   | C | A | 0.170 | 0.992 | 3.50E-01 | 2.74E-27 | 26.563 |
| 10 | 60145079 | rs12247015  | A | G | 0.173 | 0.979 | 3.90E-01 | 1.99E-27 | 26.701 |
| 10 | 60145342 | rs1937      | G | C | 0.170 | 0.989 | 4.10E-01 | 2.47E-27 | 26.608 |
| 10 | 60145597 | rs4397793   | G | C | 0.494 | 0.984 | 2.70E-03 | 7.02E-07 | 6.154  |
| 10 | 60147270 | rs10826178  | G | A | 0.491 | 0.997 | 2.60E-03 | 6.80E-07 | 6.168  |
| 10 | 60147784 | rs10763537  | G | A | 0.491 | 0.997 | 3.00E-03 | 6.24E-07 | 6.205  |
| 10 | 60148692 | rs2306604   | A | G | 0.492 | 0.993 | 2.50E-03 | 5.79E-07 | 6.238  |
| 10 | 60151026 | rs10826179  | A | G | 0.492 | 0.996 | 1.90E-03 | 6.00E-07 | 6.222  |
| 10 | 60155120 | rs1049432   | G | T | 0.172 | 0.995 | 4.90E-01 | 2.95E-27 | 26.530 |
| 10 | 60156166 | rs11006132  | A | G | 0.172 | 0.995 | 5.10E-01 | 2.83E-27 | 26.548 |
| 10 | 60156584 | rs11006133  | G | A | 0.491 | 0.993 | 2.30E-03 | 5.68E-07 | 6.246  |
| 10 | 60157339 | rs7089361   | C | T | 0.491 | 0.992 | 2.10E-03 | 5.47E-07 | 6.262  |
| 10 | 60158385 | rs12259591  | G | A | 0.489 | 0.997 | 1.60E-03 | 6.11E-07 | 6.214  |
| 10 | 60158446 | rs12254586  | T | C | 0.489 | 0.997 | 1.80E-03 | 6.12E-07 | 6.213  |
| 10 | 60159362 | rs12245545  | T | G | 0.489 | 0.996 | 1.60E-03 | 6.15E-07 | 6.211  |
| 10 | 60160312 | rs7077225   | G | T | 0.490 | 0.991 | 2.60E-03 | 6.42E-07 | 6.192  |
| 10 | 60160455 | rs16912212  | A | G | 0.489 | 0.996 | 1.30E-03 | 6.04E-07 | 6.219  |
| 10 | 60161172 | rs4525176   | G | A | 0.491 | 0.994 | 1.00E-03 | 4.97E-07 | 6.304  |

|    |          |            |   |   |       |       |          |          |        |
|----|----------|------------|---|---|-------|-------|----------|----------|--------|
| 10 | 60161640 | rs10763540 | A | G | 0.491 | 0.994 | 1.20E-03 | 4.97E-07 | 6.304  |
| 10 | 60164560 | rs11006137 | G | A | 0.499 | 0.984 | 1.10E-03 | 1.54E-07 | 6.813  |
| 10 | 60164820 | rs10826182 | C | T | 0.499 | 0.984 | 1.10E-03 | 1.59E-07 | 6.798  |
| 10 | 60167882 | rs6481387  | C | T | 0.499 | 0.984 | 2.30E-03 | 1.45E-07 | 6.840  |
| 10 | 60168003 | rs7905675  | G | A | 0.499 | 0.984 | 2.30E-03 | 1.45E-07 | 6.840  |
| 10 | 60169880 | rs11817790 | G | T | 0.499 | 0.983 | 2.50E-03 | 1.48E-07 | 6.830  |
| 10 | 60175440 | rs61190999 | C | T | 0.172 | 0.962 | 4.50E-01 | 2.96E-25 | 24.529 |
| 10 | 60193608 | rs76455223 | T | A | 0.171 | 0.933 | 9.40E-01 | 1.38E-23 | 22.861 |
| 10 | 60228964 | rs61875518 | G | A | 0.157 | 0.967 | 1.20E-01 | 1.12E-13 | 12.952 |
| 10 | 60229347 | rs1427215  | G | A | 0.157 | 0.970 | 5.60E-02 | 1.37E-13 | 12.862 |
| 10 | 60230671 | rs61875520 | C | G | 0.160 | 0.989 | 3.80E-01 | 1.51E-13 | 12.820 |
| 10 | 60231657 | rs7093118  | T | C | 0.160 | 0.989 | 3.80E-01 | 1.51E-13 | 12.820 |
| 10 | 60240354 | rs17644676 | A | G | 0.161 | 0.990 | 4.80E-01 | 2.15E-13 | 12.669 |
| 10 | 60241036 | rs35258735 | T | A | 0.161 | 0.990 | 4.80E-01 | 2.15E-13 | 12.669 |
| 10 | 60244111 | rs61875523 | A | G | 0.161 | 0.990 | 4.80E-01 | 2.16E-13 | 12.666 |
| 10 | 60245124 | rs77192138 | G | A | 0.156 | 0.983 | 5.90E-01 | 4.60E-13 | 12.337 |
| 10 | 60247792 | rs61875524 | C | T | 0.124 | 0.997 | 2.30E-01 | 2.03E-09 | 8.693  |
| 10 | 60257846 | rs74335736 | G | A | 0.124 | 0.998 | 2.90E-01 | 2.28E-09 | 8.642  |
| 10 | 60258420 | rs77095691 | T | C | 0.124 | 0.998 | 2.90E-01 | 2.28E-09 | 8.642  |
| 10 | 60261176 | rs76383270 | C | T | 0.124 | 0.998 | 2.90E-01 | 2.28E-09 | 8.642  |
| 10 | 60261367 | rs76110033 | A | T | 0.124 | 0.998 | 2.90E-01 | 2.28E-09 | 8.642  |
| 10 | 60262181 | rs78111290 | T | C | 0.124 | 0.998 | 2.90E-01 | 2.28E-09 | 8.642  |
| 10 | 60264332 | rs1427208  | T | A | 0.124 | 0.991 | 3.60E-01 | 4.94E-09 | 8.307  |
| 10 | 60264609 | rs11006167 | G | A | 0.127 | 0.972 | 3.40E-01 | 8.44E-09 | 8.073  |
| 10 | 60293094 | rs12571046 | A | C | 0.107 | 0.936 | 4.90E-01 | 4.91E-08 | 7.309  |
| 10 | 60374087 | rs11006205 | A | C | 0.107 | 0.945 | 6.30E-01 | 7.99E-07 | 6.097  |

This table shows the list of SNPs associated with amount of mtDNA quantified from 1.7X coverage next generation sequencing on 10,442 samples with P values  $< 10^{-6}$  in a leave-one-chromosome-out linear-mixed model implemented in FastLMM. The first five columns contain the chromosome (CHR), position (POS), SNP identifier (RSID), and reference (REF) and alternative (ALT) alleles; the next three columns show the alternative allele frequency (FREQ) of the SNPs in CONVERGE, the IMPUTE2-style imputation information score (IMPUTE2-INFO) of the imputed allele dosages, and the P-value of violation of Hardy Weinberg Equilibrium (HWE\_P); the last two columns show the P-value of association of the SNPs with amount of mtDNA in CONVERGE in a linear mixed-model (P) and the  $-\log_{10}$  of the P-value (LOGP).

**Table S2, Related to Experimental Procedures: Frequency of diagnostic alleles for mitochondrial haplogroups**

| Haplogroup | Diagnostic site | Reference Allele | Diagnostic Allele | Frequency (%) |           |             |       |              |          |
|------------|-----------------|------------------|-------------------|---------------|-----------|-------------|-------|--------------|----------|
|            |                 |                  |                   | Central Asia  | East Asia | Han Chinese | 1000G | 1000G CHSCHB | CONVERGE |
| A          | 663             | A                | G                 | 7.00          | 7.00      | 4.00-16.70  | 5.54  | 6.02         | 7.21     |
| B          | 8280-8289       | ACCCCCTCTA       | A                 | 5.00          | 16.00     | 0.60-3.30   | NA    | NA           | NA       |
| C          | 13263           | A                | G                 | 12.00         | 5.00      | 2.00-8.00   | 3.04  | 3.24         | 3.98     |
| D          | 5178            | C                | A                 | 15.00         | 26.00     | 1.40-3.30   | 5.15  | 22.55        | 21.67    |
| E          | 13626           | C                | T                 | 0.00          | 0.00      | NA          | NA    | NA           | 0.09     |
| F          | 6392            | T                | C                 | 5.00          | 11.00     | 1.40-6.00   | 3.71  | 14.42        | 14.34    |
| G          | 4833            | A                | G                 | 5.00          | 4.00      | NA          | 0.00  | 0.00         | 14.77    |
| H          | 7028            | C                | C                 | 15.00         | 1.00      | NA          | 11.37 | 0.00         | NA       |
| I          | 4529            | A                | T                 | 1.00          | 0.00      | NA          | 0.05  | 0.00         | NA       |
| J          | 13708           | G                | A                 | 3.00          | 1.00      | NA          | 5.27  | 5.56         | 4.31     |
| K          | 12308           | A                | G                 | 1.00          | 0.00      | NA          | NA    | NA           | NA       |
| L          | 3594            | C                | T                 | 0.00          | 0.00      | NA          | 15.78 | 0.00         | 0.02     |
| S          | 8404            | T                | C                 | 0.00          | 0.00      | NA          | 0.19  | 0.92         | 0.28     |
| T          | 4917            | A                | G                 | 6.00          | 0.00      | NA          | 0.22  | 0.00         | 0.28     |
| U          | 12308           | A                | G                 | 10.00         | 0.00      | NA          | NA    | NA           | NA       |
| V          | 4580            | G                | A                 | 0.00          | 0.00      | NA          | NA    | NA           | NA       |
| W          | 11947           | A                | G                 | 2.00          | 0.00      | NA          | 0.96  | 0.00         | 0.06     |
| X          | 6371            | C                | T                 | 0.00          | 0.00      | NA          | 0.43  | 0.00         | 0.02     |
| Y          | 8392            | G                | A                 | 1.00          | 1.00      | 1.30-3.80   | 0.19  | 0.00         | NA       |
| Z          | 9090            | T                | C                 | 2.00          | 2.00      | 1.30-7.10   | 0.31  | 1.85         | 3.24     |

This table shows in the first four columns the mitochondrial haplogroup, diagnostic site for the haplogroup, the reference allele in the human mtDNA reference NC\_012920.1, and the diagnostic allele. The next six columns show the frequency (%) of occurrence of the diagnostic allele in Central Asians and East Asians from MitoMap[S1], estimates from multiple studies in Han Chinese population[S2], all 1000 Genomes Phase 3 samples, 1000 Genomes Phase 3 Chinese Beijing (CHB) and Chinese South (CHS) samples, and CONVERGE study samples.

**Table S3, Related to Experimental Procedures: Correlation between PC1 in CONVERGE and four homoplasmic variants adaptive to arctic climate**

| Variant position | Adaptive allele | Haplogroup | Gene | Amino acid change | Linear regression P value with PC1 | Coefficient | Allele frequency |
|------------------|-----------------|------------|------|-------------------|------------------------------------|-------------|------------------|
| 4824             | G               | A          | ND2  | T112A             | NA                                 | NA          | NA               |
| 8794             | T               | A          | ATP6 | H90Y              | NA                                 | NA          | NA               |
| 11969            | A               | C          | ND4  | A404T             | 0.00056                            | 0.0022      | 0.020            |
| 15204            | C               | C          | cytb | I153T             | 0.00290                            | 0.0025      | 0.013            |

This table shows in the first three columns position, adaptive allele, haplogroup in which four previously identified homoplasmic variants reported to be present in Asian mitochondrial Haplogroups (A, C, D and X) [S3] and associated with colder climates. The next two columns show the genes which the variants reside in, and the amino acid changes they cause. The next two columns show the association P value and regression coefficient between the presence of the adaptive alleles and PC1 in CONVERGE (Experimental Procedures), which captures the North-South cline. The final column shows the allele frequency of the adaptive alleles in CONVERGE. Two sites at positions 4824 and 8794 were not called in CONVERGE due to lack of coverage.



**Table S4, Related to Experimental Procedures: Correlation between degree of heteroplasmy called in 72 samples from low coverage sequencing and high-coverage sequencing of long range PCR of mtDNA**

| Position       | Mean degree of heteroplasmy |                | Pearson r2   | P-value      |
|----------------|-----------------------------|----------------|--------------|--------------|
|                | Low coverage                | Long range PCR |              |              |
| <b>MT146</b>   | <b>0.118</b>                | <b>0.126</b>   | <b>0.999</b> | <b>0.000</b> |
| <b>MT451</b>   | <b>0.011</b>                | <b>0.012</b>   | <b>0.999</b> | <b>0.000</b> |
| MT512          | 0.000                       | 0.006          | NA           | NA           |
| <b>MT513</b>   | <b>0.374</b>                | <b>0.411</b>   | <b>0.984</b> | <b>0.000</b> |
| MT567          | 0.004                       | 0.011          | 0.999        | 0.000        |
| MT955          | 0.000                       | 0.002          | NA           | NA           |
| MT1290         | 0.000                       | 0.000          | NA           | NA           |
| MT2226         | 0.000                       | 0.000          | NA           | NA           |
| MT2487         | 0.010                       | 0.000          | 0.013        | 0.340        |
| MT3167         | 0.000                       | 0.000          | NA           | NA           |
| MT3243         | 0.000                       | 0.000          | NA           | NA           |
| MT3447         | 0.000                       | 0.001          | NA           | NA           |
| <b>MT5894</b>  | <b>0.033</b>                | <b>0.060</b>   | <b>0.829</b> | <b>0.000</b> |
| MT6289         | 0.000                       | 0.001          | NA           | NA           |
| MT10283        | 0.000                       | 0.000          | 0.003        | 0.663        |
| MT10306        | 0.027                       | 0.000          | 0.000        | 0.942        |
| MT11031        | 0.001                       | 0.005          | 0.000        | 0.911        |
| MT11866        | 0.000                       | 0.002          | NA           | NA           |
| MT12417        | 0.002                       | 0.005          | 0.013        | 0.341        |
| MT12684        | 0.000                       | 0.000          | 0.004        | 0.615        |
| MT15536        | 0.000                       | 0.000          | NA           | NA           |
| MT15900        | 0.000                       | 0.000          | 0.001        | 0.806        |
| <b>MT15939</b> | <b>0.012</b>                | <b>0.012</b>   | <b>1.000</b> | <b>0.000</b> |
| <b>MT16129</b> | <b>0.183</b>                | <b>0.183</b>   | <b>0.993</b> | <b>0.000</b> |
| MT16179        | 0.003                       | 0.057          | 0.003        | 0.657        |
| MT16496        | 0.002                       | 0.092          | 0.017        | 0.285        |

This table shows the degrees of heteroplasmy in 72 samples for whom there were both low-coverage sequencing data and high coverage sequencing data from long range PCR of mtDNA. The first column shows the 26 sites in the mtDNA identified to be heteroplasmic at an occurrence of higher than 0.1% in CONVERGE. The next two columns show the mean degree of heteroplasmy among the 72 samples at each of the 26 sites, quantified from low coverage sequencing and high coverage sequencing of long range PCR product on mtDNA respectively. Where the mean degree of heteroplasmy is 0 in either columns, there was no heteroplasmy detected in any of the 72 samples using the relevant dataset. The next two columns show the per site Pearson correlation r2 and

between the degree of heteroplasmy called from low coverage sequencing and high coverage sequencing of long range PCR on mtDNA in 72 sample, and the P-value of the correlation. Six sites highlighted in bold showed mean degrees of heteroplasmy of over 1% in both datasets and were highly correlated, and were included in association testing between site-specific degree of heteroplasmy and amount of mtDNA.

**Table S5, Related to Table 3: Association between degree of heteroplasmy at six heteroplasmic sites with MDD**

| MARKER  | REF | ALT | FREQ  | TYPE                | GENE                   | MDD    |        |          |       |
|---------|-----|-----|-------|---------------------|------------------------|--------|--------|----------|-------|
|         |     |     |       |                     |                        | EFFECT | VAREXP | P        | LOGP  |
| MT146   | T   | C   | 0.005 | upstream            | RNR1,tRNA-Phe          | 1.275  | 0.003  | 2.39E-01 | 0.622 |
| MT451   | A   | I   | 0.002 | regulatory          | NA                     | 0.734  | 0.000  | 8.39E-02 | 1.076 |
| MT513   | G   | I   | 0.416 | regulatory          | NA                     | -0.035 | 0.000  | 2.31E-01 | 0.636 |
| MT5894  | A   | I   | 0.017 | regulatory          | NA                     | -0.582 | 0.001  | 3.15E-01 | 0.502 |
| MT15939 | C   | I   | 0.014 | regulatory          | NA                     | 0.051  | 0.000  | 1.66E-01 | 0.780 |
| MT16129 | G   | A   | 0.020 | upstream;downstream | tRNA-Pro;CYTB,tRNA-Thr | -0.229 | 0.000  | 2.16E-01 | 0.665 |

This table shows the association between degree of heteroplasmy at four heteroplasmic sites in the mtDNA and major depressive disorder (MDD) in 10,442 samples. The first four columns show the position of the heteroplasmic site in mtDNA (MARKER), reference allele in the human mitochondrial genome reference NC\_012920.1 (REF), the alternative allele (ALT) for which the heteroplasmy is detected, and the frequency of occurrence of this heteroplasmy in the cohort (FREQ). An "I" in the ALT column means the heteroplasmy is for an insertion or deletion mutation. The next two columns show characteristics of the four heteroplasmic sites: annotation of variant function (ANNOTATION) and nearest gene (GENE). The final four columns show the results of association testing between degree of heteroplasmy at each site with amount of mtDNA by logistic regression: direction of effect (EFFECT) from linear regression, variance of amount of mtDNA explained by the site heteroplasmy (VAREXP) from difference in residual sum of squares in analysis of variance (ANOVA) between the model with and without degree of heteroplasmy as the test term in logistic regression, P value of association (P) between degree of heteroplasmy and MDD, and  $-\log_{10}$  of the P value (LOGP). Degree of heteroplasmy at none of the sites were significantly associated with MDD.

## Supplemental Experimental Procedures

### 1. Verifying homoplasmic mtDNA variation calls

As accurate calls of mtDNA homoplasmic variants form the basis of association analyses and are important in preventing misidentification of heteroplasmic variants in the mtDNA, we checked for both sensitivity and accuracy in calling homoplasmic variants from low-coverage whole-genome sequencing data. The strategy to call homoplasmic variants was to look for non-reference alleles supported by more than 90% of the reads at any particular site in each sample, but only at those sites where there are more than 10 uniquely mapped reads of high mapping quality (>59 in Phred scale).

#### *Sensitivity of variant calling*

To estimate the sensitivity of our variant calling method, we applied our method of homoplasmic variant calling on the 1000 Genomes Phase 3 whole-genome sequencing data (n=2,598, of which 216 are from Han Chinese populations, CHB and CHS). We compared the set of common homoplasmic variants (>0.1%) we called in CONVERGE with homoplasmic variants called in 1000 Genomes Project Phase 3 samples. 948 out of 1,030 (88.85%) of the common homoplasmic variants we found in CONVERGE were found to be polymorphic in 1000 Genomes Phase 3, and 546 of them (51.17%) were found to be occurring at >0.1% frequency in the Han Chinese populations.

#### *Presence of mtDNA haplogroup markers*

We checked the allele frequencies of homoplasmic variant sites called in CONVERGE at diagnostic SNPs for haplogroups against previously documented frequencies in Central Asians and East Asians in MitoMap [S1], the combined estimates of allele frequencies from previous studies on Han Chinese populations [S2], as well as allele frequencies called from all 1000 Genomes Phase 3 samples and those from Han Chinese populations (Table S2). The frequencies of alleles at SNPs diagnostic for the different haplogroups are highly consistent with those previously reported.

We checked for the presence of four homoplasmic variants previously reported to be present in Asian mitochondrial Haplogroups (A, C, D and X) [S3] and associated with colder climates in our sample. Two of the four variants were identified as homoplasmic

variants occurring at frequencies above 0.1% in our sample, and were found to be associated with PC1, capturing the North-South cline of geographical origin of our samples, calculated from eigen decomposition of the a genetic relatedness matrix calculated from 322,911 common SNPs of minor allele frequency (MAF) > 1% and linkage disequilibrium  $r^2 < 0.5$  using GCTA (version 1.24.4, Methods)[S4] (Table S3). Two variants were not called in our dataset due to lack of coverage at the sites.

## **2. Verifying heteroplasmic mtDNA variation calls by long range polymerase chain reaction (PCR) and sequencing of mitochondrial DNA**

To identify and quantify the number of heteroplasmic sites independent of sequence coverage we down-sampled the mtDNA reads so that each site was covered by 50 reads. We disregarded sites at which more than 10% of individuals did not fulfill this criterion, so that estimates of heteroplasmy from all remaining sites were based on equal coverage on an adequate sample size. We required the presence of two alleles, each supported by two or more reads at sites and occurring at higher than 0.1% frequency in the cohort (10 individuals), for a site to be considered heteroplasmic. Using these criteria we identified heteroplasmy at 26 positions in the mtDNA.

Low-coverage sequencing has a high false-negative rate in the calling of heteroplasmic sites, and some of the heteroplasmies we detected using low-coverage sequencing might be reads originating from NUMTs mapping incorrectly to the mtDNA reference. Therefore we performed the same analysis using the high-coverage sequencing on 72 samples we obtained with long-range PCR, ensuring both high-coverage and mtDNA origin of sequencing reads.

We quantified heteroplasmy in the 72 samples, after down-sampling the high-coverage sequencing to 500 reads per site and discarding those samples with fewer than 500 reads covering at each site. We only counted heteroplasmic sites where the fraction of reads supporting the minor heteroplasmic allele was higher than 1% (supported by a minimum of 5 reads). This yielded 408 such sites. Comparison between mean degree of heteroplasmy obtained from low-coverage sequencing on 72 samples and high-coverage sequencing of products of long range PCR on mtDNA on the same samples showed that when the mean degree of heteroplasmy among samples is high (10% or higher) in both low-coverage sequencing and long range PCR data, the correlation between the two estimates is high (Table S4). For lower degrees of heteroplasmy, this correlation drops substantially. Therefore we considered further only sites where heteroplasmy rates are greater than 10% in an individual.

## Supplemental References

- S1. Lott, M.T., et al., *mtDNA Variation and Analysis Using MITOMAP and MITOMASTER*. *Curr Protoc Bioinformatics*, 2013. **1**(123): p. 1 23 1-1 23 26.
- S2. Yao, Y.G., et al., *Phylogeographic differentiation of mitochondrial DNA in Han Chinese*. *Am J Hum Genet*, 2002. **70**(3): p. 635-51.
- S3. Ruiz-Pesini, E., et al., *Effects of purifying and adaptive selection on regional variation in human mtDNA*. *Science*, 2004. **303**(5655): p. 223-6.
- S4. Yang, J., et al., *GCTA: a tool for genome-wide complex trait analysis*. *Am J Hum Genet*, 2011. **88**(1): p. 76-82.
